# Supplementary material for: Serum Amino Acids in Association with Prevalent and Incident Type 2 Diabetes in A Chinese Population
Source: PubMed Central journal article supplement (PMC6359471; doi:10.3390/metabo9010014), 2019-01-14
Supplement: metabolites-09-00014-s001.pdf [file metabolites-09-00014-s001.pdf]

Table S1. Optimized MRM conditions for determination of 19 amino acids

| Amino acids   | HMDB ID     | R.T.<br>(min) | Transition ion<br>(m/z) | Fragmentor<br>voltage (V) | CE<br>(eV) | Internal standard                                                      | Calibration curve |
|---------------|-------------|---------------|-------------------------|---------------------------|------------|------------------------------------------------------------------------|-------------------|
| Essential     |             |               |                         |                           |            |                                                                        |                   |
| Histidine     | HMDB0000177 | 15.11         | 156.1 -> 110.0          | 100                       | 20         | <sup>13</sup> C <sub>6</sub> , <sup>15</sup> N <sub>3</sub> -Histidine | Histidine         |
| Isoleucine    | HMDB0000172 | 9.11          | 132.1 -> 86.1           | 90                        | 10         | <sup>13</sup> C <sub>6</sub> , <sup>15</sup> N-Isoleucine              | Isoleucine        |
| Leucine       | HMDB0000687 | 8.53          | 132.1 -> 86.1           | 90                        | 10         | <sup>13</sup> C <sub>6</sub> , <sup>15</sup> N-Leucine                 | Leucine           |
| Lysine        | HMDB0000182 | 15.38         | 147.1 -> 84.0           | 90                        | 14         | <sup>13</sup> C <sub>6</sub> , <sup>15</sup> N <sub>2</sub> -Lysine    | Lysine            |
| Methionine    | HMDB0000696 | 10.01         | 150.1 -> 104.0          | 90                        | 10         | <sup>13</sup> C <sub>5</sub> , <sup>15</sup> N-Methionine              | Methionine        |
| Phenylalanine | HMDB0000159 | 8.14          | 166.1 -> 120.1          | 90                        | 14         | <sup>13</sup> C <sub>9</sub> , <sup>15</sup> N-Phenylalanine           | Phenylalanine     |
| Threonine     | HMDB0000167 | 12.87         | 120.1 -> 74.0           | 90                        | 20         | <sup>13</sup> C <sub>4</sub> , <sup>15</sup> N-Threonine               | Threonine         |
| Tryptophan    | HMDB0000929 | 8.15          | 205.1 -> 146.0          | 70                        | 18         | <sup>13</sup> C <sub>9</sub> , <sup>15</sup> N-Phenylalanine           | Tryptophan        |
| Valine        | HMDB0000883 | 10.79         | 118.1 -> 72.1           | 90                        | 10         | <sup>13</sup> C <sub>5</sub> , <sup>15</sup> N-Valine                  | Valine            |
| Non-essential |             |               |                         |                           |            |                                                                        |                   |
| Alanine       | HMDB0000161 | 11.97         | 90.1 -> 44.0            | 70                        | 10         | <sup>13</sup> C <sub>3</sub> , <sup>15</sup> N-Alanine                 | Alanine           |
| Arginine      | HMDB0000517 | 15.23         | 175.1 -> 70.0           | 90                        | 20         | <sup>13</sup> C <sub>6</sub> , <sup>15</sup> N <sub>4</sub> -Arginine  | Arginine          |
| Asparagine    | HMDB0000168 | 14.15         | 133.1 -> 74.0           | 70                        | 14         | <sup>13</sup> C <sub>2</sub> , <sup>15</sup> N-Glycine                 | Asparagine        |
| Aspartic acid | HMDB0000191 | 15.03         | 134.0 -> 74.0           | 90                        | 15         | <sup>13</sup> C <sub>4</sub> , <sup>15</sup> N-Aspartic acid           | Aspartic acid     |
| Glutamic acid | HMDB0000148 | 14.59         | 148.1 -> 84.0           | 90                        | 14         | <sup>13</sup> C <sub>5</sub> , <sup>15</sup> N-Glutamic acid           | Glutamic acid     |
| Glutamine     | HMDB0000641 | 13.95         | 147.1 -> 84.0           | 70                        | 16         | <sup>13</sup> C <sub>6</sub> , <sup>15</sup> N <sub>3</sub> -Histidine | Glutamine         |
| Glycine       | HMDB0000123 | 13.30         | 76.0 -> 30.0            | 70                        | 6          | <sup>13</sup> C <sub>2</sub> , <sup>15</sup> N-Glycine                 | Glycine           |
| Proline       | HMDB0000162 | 10.79         | 116.1 -> 70.0           | 90                        | 14         | <sup>13</sup> C <sub>5</sub> , <sup>15</sup> N-Proline                 | Proline           |
| Serine        | HMDB0000187 | 14.00         | 106.1 -> 60.0           | 90                        | 8          | <sup>13</sup> C <sub>3</sub> , <sup>15</sup> N-Serine                  | Serine            |
| Tyrosine      | HMDB0000158 | 10.78         | 182.1 -> 136.0          | 90                        | 16         | <sup>13</sup> C <sub>9</sub> , <sup>15</sup> N-Tyrosine                | Tyrosine          |

All the 19 metabolites were level 1 identifications according to Metabolomics Standards Initiative (MSI).

Table S2. Method validation for determination of 19 amino acids

| Amino acids   | LOD<br>( $\mu\text{mol/L}$ )<br>S/N = 3 | Linearity range<br>( $\mu\text{mol/L}$ )<br>( $R^2 > 0.997$ ) | Recovery (%) |        |      | Precision (RSD %) |             |
|---------------|-----------------------------------------|---------------------------------------------------------------|--------------|--------|------|-------------------|-------------|
|               |                                         |                                                               | Low          | Medium | High | Intra-batch       | Inter-batch |
| Essential     |                                         |                                                               |              |        |      |                   |             |
| Histidine     | 0.100                                   | 0.1-200                                                       | 88           | 103    | 114  | 1.76              | 3.77        |
| Isoleucine    | 0.030                                   | 0.1-200                                                       | 97           | 100    | 112  | 0.80              | 2.02        |
| Leucine       | 0.030                                   | 0.1-200                                                       | 99           | 103    | 114  | 0.84              | 2.59        |
| Lysine        | 0.003                                   | 0.1-200                                                       | 93           | 109    | 111  | 1.68              | 3.52        |
| Methionine    | 0.060                                   | 0.2-100                                                       | 110          | 95     | 103  | 5.07              | 4.74        |
| Phenylalanine | 0.010                                   | 0.1-200                                                       | 93           | 106    | 113  | 1.11              | 2.45        |
| Threonine     | 0.200                                   | 0.2-200                                                       | 105          | 101    | 112  | 2.67              | 5.32        |
| Tryptophan    | 0.005                                   | 0.05-100                                                      | 95           | 98     | 115  | 1.79              | 4.97        |
| Valine        | 0.030                                   | 0.1-200                                                       | 108          | 109    | 108  | 2.44              | 3.58        |
| Non-essential |                                         |                                                               |              |        |      |                   |             |
| Alanine       | 0.100                                   | 0.1-200                                                       | 108          | 107    | 111  | 1.58              | 3.29        |
| Arginine      | 0.003                                   | 0.1-100                                                       | 84           | 96     | 106  | 1.71              | 4.81        |
| Asparagine    | 0.015                                   | 0.2-100                                                       | 89           | 96     | 109  | 2.24              | 5.14        |
| Aspartic acid | 0.800                                   | 0.8-200                                                       | 107          | 91     | 107  | 3.30              | 6.78        |
| Glutamic acid | 0.015                                   | 0.1-200                                                       | 106          | 111    | 116  | 1.63              | 3.32        |
| Glutamine     | 0.009                                   | 0.2-400                                                       | 97           | 113    | 112  | 2.21              | 5.30        |
| Glycine       | 0.200                                   | 0.2-200                                                       | 102          | 102    | 110  | 3.94              | 6.07        |
| Proline       | 0.020                                   | 0.1-200                                                       | 95           | 109    | 112  | 1.49              | 3.03        |
| Serine        | 0.050                                   | 0.1-200                                                       | 101          | 96     | 108  | 1.74              | 5.07        |
| Tyrosine      | 0.190                                   | 0.2-200                                                       | 92           | 92     | 100  | 5.24              | 5.82        |

Table S3. The associations between amino acids and incident type 2 diabetes (n = 160)

| Amino acids               | OR across tertiles (T) <sup>a</sup> |                   |                   |                    |       | OR per SD increment <sup>a</sup> |                |       |
|---------------------------|-------------------------------------|-------------------|-------------------|--------------------|-------|----------------------------------|----------------|-------|
|                           | T1                                  | T2, OR (95% CI)   | T3, OR (95% CI)   | <i>P</i> for trend | FDR   | OR (95% CI)                      | <i>P</i> value | FDR   |
| Essential amino acids     |                                     |                   |                   |                    |       |                                  |                |       |
| Valine                    | 1.00                                | 1.62 (0.81, 3.26) | 2.68 (1.19, 6.04) | 0.017              | 0.200 | 1.50 (1.09, 2.08)                | 0.014          | 0.133 |
| Isoleucine                | 1.00                                | 1.39 (0.72, 2.68) | 2.20 (1.02, 4.73) | 0.045              | 0.214 | 1.37 (0.99, 1.90)                | 0.054          | 0.205 |
| Leucine                   | 1.00                                | 1.58 (0.80, 3.14) | 1.85 (0.93, 3.68) | 0.080              | 0.304 | 1.44 (1.06, 1.95)                | 0.021          | 0.133 |
| Tryptophan                | 1.00                                | 1.10 (0.56, 2.18) | 1.96 (0.88, 4.36) | 0.114              | 0.361 | 1.62 (1.11, 2.37)                | 0.012          | 0.133 |
| Histidine                 | 1.00                                | 0.93 (0.45, 1.89) | 0.61 (0.28, 1.31) | 0.201              | 0.527 | 0.84 (0.62, 1.15)                | 0.290          | 0.409 |
| Lysine                    | 1.00                                | 1.56 (0.79, 3.09) | 1.51 (0.77, 2.97) | 0.222              | 0.527 | 1.20 (0.91, 1.57)                | 0.202          | 0.344 |
| Methionine                | 1.00                                | 1.22 (0.63, 2.35) | 1.48 (0.73, 2.98) | 0.276              | 0.583 | 1.23 (0.92, 1.64)                | 0.166          | 0.344 |
| Phenylalanine             | 1.00                                | 0.93 (0.47, 1.84) | 1.34 (0.69, 2.60) | 0.393              | 0.622 | 1.19 (0.90, 1.57)                | 0.217          | 0.344 |
| Threonine                 | 1.00                                | 0.64 (0.32, 1.27) | 0.84 (0.41, 1.72) | 0.608              | 0.735 | 1.06 (0.80, 1.40)                | 0.689          | 0.873 |
| Non-essential amino acids |                                     |                   |                   |                    |       |                                  |                |       |
| Glutamic acid             | 1.00                                | 1.53 (0.76, 3.04) | 2.55 (1.15, 5.64) | 0.021              | 0.200 | 1.31 (0.95, 1.80)                | 0.099          | 0.314 |
| Tyrosine                  | 1.00                                | 1.13 (0.57, 2.26) | 2.26 (1.08, 4.59) | 0.033              | 0.209 | 1.35 (1.00, 1.82)                | 0.046          | 0.205 |
| Glycine                   | 1.00                                | 1.13 (0.53, 2.37) | 0.70 (0.31, 1.54) | 0.322              | 0.608 | 0.80 (0.59, 1.09)                | 0.154          | 0.344 |
| Alanine                   | 1.00                                | 1.30 (0.62, 2.70) | 1.41 (0.69, 2.90) | 0.352              | 0.608 | 1.17 (0.87, 1.56)                | 0.301          | 0.409 |
| Serine                    | 1.00                                | 1.05 (0.53, 2.10) | 0.75 (0.36, 1.60) | 0.429              | 0.627 | 0.96 (0.68, 1.34)                | 0.808          | 0.903 |
| Asparagine                | 1.00                                | 0.43 (0.19, 0.93) | 1.12 (0.50, 2.55) | 0.616              | 0.735 | 0.99 (0.72, 1.37)                | 0.963          | 0.995 |
| Proline                   | 1.00                                | 1.24 (0.61, 2.51) | 0.84 (0.42, 1.70) | 0.619              | 0.735 | 0.96 (0.71, 1.28)                | 0.758          | 0.900 |
| Glutamine                 | 1.00                                | 0.75 (0.26, 2.14) | 0.83 (0.26, 2.61) | 0.858              | 0.920 | 0.67 (0.38, 1.19)                | 0.170          | 0.344 |
| Arginine                  | 1.00                                | 0.59 (0.29, 1.18) | 0.97 (0.50, 1.88) | 0.903              | 0.920 | 1.00 (0.77, 1.30)                | 0.995          | 0.995 |
| Aspartic acid             | 1.00                                | 0.90 (0.40, 2.04) | 0.95 (0.39, 2.29) | 0.920              | 0.920 | 1.26 (0.88, 1.81)                | 0.202          | 0.344 |

Incident cases were defined as those had HbA1c <6.5% (47.5 mmol/mol) at baseline when blood samples were collected (1999-2004), while reported to have diagnosed diabetes during the follow-up (2006-2010).

<sup>a</sup> Odds ratio (OR) with 95% confidence interval (CI) and P values were calculated by conditional logistic regression after adjustment for BMI, history of hypertension, smoking status, HDL-cholesterol, and triglycerides.

Table S4. Metabolite concentrations ( $\mu\text{M}$ , Mean  $\pm$  SD) in controls stratified by fasting status

| Amino acids   | Non-fasting<br>(n = 228) | Fasting<br>(n = 76) | <i>P</i> <sup>a</sup> |
|---------------|--------------------------|---------------------|-----------------------|
| Essential     |                          |                     |                       |
| Histidine     | 84.57 $\pm$ 9.44         | 86.68 $\pm$ 9.97    | 0.108                 |
| Isoleucine    | 74.31 $\pm$ 20.28        | 67.91 $\pm$ 13.06   | 0.002                 |
| Leucine       | 146.36 $\pm$ 32.65       | 143.62 $\pm$ 23.02  | 0.423                 |
| Lysine        | 442.13 $\pm$ 78.73       | 442.93 $\pm$ 62.04  | 0.928                 |
| Methionine    | 29.89 $\pm$ 8.27         | 30.67 $\pm$ 5.27    | 0.340                 |
| Phenylalanine | 92.58 $\pm$ 15.66        | 87.53 $\pm$ 11.57   | 0.003                 |
| Threonine     | 133.68 $\pm$ 26.01       | 137.94 $\pm$ 24.91  | 0.204                 |
| Tryptophan    | 53.32 $\pm$ 9.53         | 52.20 $\pm$ 7.93    | 0.314                 |
| Valine        | 348.04 $\pm$ 58.60       | 338.60 $\pm$ 49.99  | 0.175                 |
| Non-essential |                          |                     |                       |
| Alanine       | 474.59 $\pm$ 86.98       | 427.80 $\pm$ 82.24  | <0.001                |
| Arginine      | 110.44 $\pm$ 23.78       | 97.64 $\pm$ 18.18   | <0.001                |
| Asparagine    | 62.14 $\pm$ 12.13        | 61.99 $\pm$ 10.97   | 0.921                 |
| Aspartic acid | 2.17 $\pm$ 0.86          | 2.19 $\pm$ 0.85     | 0.914                 |
| Glutamic acid | 129.82 $\pm$ 40.43       | 136.79 $\pm$ 46.90  | 0.248                 |
| Glutamine     | 266.27 $\pm$ 58.54       | 261.22 $\pm$ 56.74  | 0.505                 |
| Glycine       | 276.81 $\pm$ 51.86       | 285.00 $\pm$ 59.88  | 0.288                 |
| Proline       | 134.31 $\pm$ 38.28       | 113.85 $\pm$ 38.96  | <0.001                |
| Serine        | 159.57 $\pm$ 25.17       | 165.00 $\pm$ 31.72  | 0.178                 |
| Tyrosine      | 75.72 $\pm$ 17.03        | 71.01 $\pm$ 12.95   | 0.013                 |

<sup>a</sup> *P* values were calculated by the Student *t* test.

Table S5. Odds ratios (OR) with 95% confidence interval (CI) between amino acids and prevalent type 2 diabetes (n = 144) stratified by fasting status <sup>a</sup>

| Amino acids   | Fasting status | OR across tertiles |                   |                    |                    |                          | OR per SD increment |          |                          |
|---------------|----------------|--------------------|-------------------|--------------------|--------------------|--------------------------|---------------------|----------|--------------------------|
|               |                | T1                 | T2, OR (95% CI)   | T3, OR (95% CI)    | <i>P</i> for trend | <i>P</i> for interaction | OR (95% CI)         | <i>P</i> | <i>P</i> for interaction |
| Essential     |                |                    |                   |                    |                    |                          |                     |          |                          |
| Histidine     | Non-fasting    | 1.00               | 1.08 (0.52, 2.23) | 0.67 (0.32, 1.40)  | 0.296              | 0.788                    | 0.84 (0.62, 1.13)   | 0.256    | 0.415                    |
|               | Fasting        | 1.00               | 1.45 (0.42, 5.08) | 0.98 (0.30, 3.16)  | 0.909              |                          | 0.66 (0.39, 1.11)   | 0.116    |                          |
| Isoleucine    | Non-fasting    | 1.00               | 2.76 (1.26, 6.01) | 2.75 (1.26, 5.99)  | 0.014              | 0.586                    | 1.30 (0.96, 1.74)   | 0.089    | 0.351                    |
|               | Fasting        | 1.00               | 2.30 (0.74, 7.12) | 1.94 (0.54, 7.03)  | 0.257              |                          | 2.01 (0.92, 4.39)   | 0.079    |                          |
| Leucine       | Non-fasting    | 1.00               | 2.51 (1.19, 5.28) | 2.05 (0.97, 4.32)  | 0.057              | 0.708                    | 1.42 (1.05, 1.92)   | 0.023    | 0.580                    |
|               | Fasting        | 1.00               | 2.82 (0.84, 9.40) | 3.26 (0.91, 11.66) | 0.073              |                          | 1.78 (0.89, 3.53)   | 0.102    |                          |
| Lysine        | Non-fasting    | 1.00               | 0.81 (0.39, 1.68) | 1.77 (0.85, 3.68)  | 0.135              | 0.620                    | 1.30 (0.96, 1.76)   | 0.088    | 0.648                    |
|               | Fasting        | 1.00               | 1.29 (0.38, 4.38) | 3.07 (0.86, 11.04) | 0.075              |                          | 1.65 (0.90, 3.00)   | 0.104    |                          |
| Methionine    | Non-fasting    | 1.00               | 2.79 (1.28, 6.11) | 1.74 (0.85, 3.57)  | 0.125              | 0.784                    | 1.21 (0.92, 1.59)   | 0.177    | 0.831                    |
|               | Fasting        | 1.00               | 1.79 (0.49, 6.56) | 2.10 (0.50, 8.90)  | 0.340              |                          | 1.22 (0.55, 2.66)   | 0.626    |                          |
| Phenylalanine | Non-fasting    | 1.00               | 2.10 (0.96, 4.61) | 2.34 (1.11, 4.93)  | 0.030              | 0.018                    | 1.34 (0.99, 1.80)   | 0.057    | 0.259                    |
|               | Fasting        | 1.00               | 3.00 (0.99, 9.04) | 3.81 (0.94, 15.47) | 0.031              |                          | 1.88 (0.98, 3.60)   | 0.058    |                          |
| Threonine     | Non-fasting    | 1.00               | 0.61 (0.29, 1.27) | 0.64 (0.30, 1.36)  | 0.251              | 0.906                    | 0.83 (0.61, 1.26)   | 0.229    | 0.587                    |
|               | Fasting        | 1.00               | 1.08 (0.34, 3.46) | 0.83 (0.22, 2.48)  | 0.608              |                          | 0.90 (0.56, 1.47)   | 0.683    |                          |
| Tryptophan    | Non-fasting    | 1.00               | 0.60 (0.28, 1.29) | 1.39 (0.66, 2.94)  | 0.320              | 0.752                    | 1.18 (0.89, 1.58)   | 0.250    | 0.857                    |
|               | Fasting        | 1.00               | 0.45 (0.14, 1.43) | 1.29 (0.40, 4.18)  | 0.734              |                          | 1.28 (0.73, 2.27)   | 0.391    |                          |
| Valine        | Non-fasting    | 1.00               | 3.76 (1.75, 8.08) | 2.49 (1.14, 5.42)  | 0.022              | 0.479                    | 1.54 (1.11, 2.14)   | 0.010    | 0.309                    |
|               | Fasting        | 1.00               | 1.63 (0.49, 5.38) | 4.68 (1.23, 17.89) | 0.023              |                          | 2.23 (1.18, 4.23)   | 0.014    |                          |
| Non-essential |                |                    |                   |                    |                    |                          |                     |          |                          |
| Alanine       | Non-fasting    | 1.00               | 1.28 (0.57, 2.88) | 3.55 (1.60, 7.89)  | 0.001              | 0.937                    | 2.00 (1.37, 2.92)   | <0.001   | 0.345                    |
|               | Fasting        | 1.00               | 2.53 (0.85, 7.50) | 2.94 (0.73, 11.82) | 0.076              |                          | 1.42 (0.81, 2.49)   | 0.216    |                          |
| Arginine      | Non-fasting    | 1.00               | 0.99 (0.47, 2.11) | 0.77 (0.37, 1.60)  | 0.464              | 0.144                    | 0.91 (0.68, 1.21)   | 0.519    | 0.107                    |
|               | Fasting        | 1.00               | 0.97 (0.31, 3.02) | 2.88 (0.8, 10.44)  | 0.142              |                          | 1.72 (0.95, 3.12)   | 0.072    |                          |
| Asparagine    | Non-fasting    | 1.00               | 0.91 (0.43, 1.90) | 0.84 (0.41, 1.71)  | 0.622              | 0.817                    | 0.93 (0.70, 1.23)   | 0.600    | 0.509                    |
|               | Fasting        | 1.00               | 2.84 (0.84, 9.56) | 0.67 (0.19, 2.41)  | 0.677              |                          | 0.80 (0.46, 1.38)   | 0.421    |                          |
| Aspartic acid | Non-fasting    | 1.00               | 1.06 (0.51, 2.21) | 1.09 (0.51, 2.35)  | 0.821              | 0.719                    | 1.13 (0.81, 1.56)   | 0.468    | 0.925                    |
|               | Fasting        | 1.00               | 0.40 (0.12, 1.35) | 2.07 (0.62, 6.93)  | 0.322              |                          | 1.18 (0.76, 1.84)   | 0.466    |                          |
| Glutamic acid | Non-fasting    | 1.00               | 2.11 (1.04, 4.31) | 2.84 (1.25, 6.44)  | 0.009              | 0.699                    | 1.78 (1.25, 2.54)   | 0.001    | 0.400                    |

|           |             |      |                    |                    |       |       |                   |       |       |
|-----------|-------------|------|--------------------|--------------------|-------|-------|-------------------|-------|-------|
|           | Fasting     | 1.00 | 3.21 (0.84, 12.28) | 2.30 (0.72, 7.37)  | 0.214 |       | 1.34 (0.82, 2.18) | 0.241 |       |
| Glutamine | Non-fasting | 1.00 | 1.10 (0.52, 2.34)  | 0.44 (0.21, 0.93)  | 0.028 | 0.372 | 0.76 (0.56, 1.03) | 0.082 | 0.678 |
|           | Fasting     | 1.00 | 0.65 (0.20, 2.04)  | 0.86 (0.26, 2.77)  | 0.774 |       | 0.93 (0.57, 1.50) | 0.755 |       |
| Glycine   | Non-fasting | 1.00 | 0.50 (0.23, 1.05)  | 0.41 (0.19, 0.87)  | 0.020 | 0.594 | 0.67 (0.48, 0.94) | 0.020 | 0.709 |
|           | Fasting     | 1.00 | 0.38 (0.12, 1.24)  | 0.33 (0.10, 1.11)  | 0.067 |       | 0.64 (0.35, 1.16) | 0.142 |       |
| Proline   | Non-fasting | 1.00 | 1.21 (0.54, 2.69)  | 0.90 (0.40, 2.00)  | 0.727 | 0.190 | 1.01 (0.73, 1.40) | 0.935 | 0.503 |
|           | Fasting     | 1.00 | 1.42 (0.81, 7.29)  | 2.38 (0.53, 10.66) | 0.109 |       | 1.33 (0.81, 2.20) | 0.256 |       |
| Serine    | Non-fasting | 1.00 | 1.18 (0.56, 2.47)  | 1.62 (0.77, 3.40)  | 0.203 | 0.427 | 1.17 (0.86, 1.60) | 0.306 | 0.790 |
|           | Fasting     | 1.00 | 2.35 (0.69, 7.99)  | 3.18 (0.93, 10.92) | 0.066 |       | 1.31 (0.79, 2.15) | 0.295 |       |
| Tyrosine  | Non-fasting | 1.00 | 1.54 (0.73, 3.28)  | 1.87 (0.90, 3.92)  | 0.100 | 0.591 | 1.12 (0.84, 1.49) | 0.447 | 0.139 |
|           | Fasting     | 1.00 | 1.86 (0.60, 5.71)  | 2.42 (0.70, 8.40)  | 0.148 |       | 1.74 (0.93, 3.25) | 0.083 |       |

<sup>a</sup>OR (95%CI) and *P* values were calculated by logistic regression after adjustment for age, sex, BMI, history of hypertension, smoking status, HDL-cholesterol, and triglycerides.

Table S6. Odds ratios (OR) with 95% confidence interval (CI) between amino acids and incident type 2 diabetes (n = 160) stratified by fasting status <sup>a</sup>

| Amino acids   | Fasting status | OR across tertiles |                   |                    |                    |                          | OR per SD increment |          |                          |
|---------------|----------------|--------------------|-------------------|--------------------|--------------------|--------------------------|---------------------|----------|--------------------------|
|               |                | T1                 | T2, OR (95% CI)   | T3, OR (95% CI)    | <i>P</i> for trend | <i>P</i> for interaction | OR (95% CI)         | <i>P</i> | <i>P</i> for interaction |
| Essential     |                |                    |                   |                    |                    |                          |                     |          |                          |
| Histidine     | Non-fasting    | 1.00               | 0.97 (0.49, 1.90) | 0.90 (0.45, 1.81)  | 0.775              | 0.085                    | 0.93 (0.70, 1.23)   | 0.626    | 0.489                    |
|               | Fasting        | 1.00               | 0.46 (0.11, 1.92) | 0.20 (0.05, 0.84)  | 0.027              |                          | 0.76 (0.45, 1.28)   | 0.300    |                          |
| Isoleucine    | Non-fasting    | 1.00               | 1.56 (0.77, 3.16) | 1.58 (0.77, 3.25)  | 0.219              | 0.785                    | 1.20 (0.90, 1.60)   | 0.212    | 0.460                    |
|               | Fasting        | 1.00               | 0.58 (0.15, 2.18) | 4.44 (0.65, 30.55) | 0.256              |                          | 1.93 (0.79, 4.70)   | 0.150    |                          |
| Leucine       | Non-fasting    | 1.00               | 1.90 (0.94, 3.83) | 1.39 (0.70, 2.78)  | 0.353              | 0.187                    | 1.25 (0.94, 1.65)   | 0.127    | 0.265                    |
|               | Fasting        | 1.00               | 1.08 (0.28, 4.17) | 6.50 (0.97, 43.38) | 0.070              |                          | 2.06 (0.85, 5.00)   | 0.109    |                          |
| Lysine        | Non-fasting    | 1.00               | 1.74 (0.86, 3.52) | 1.25 (0.64, 2.44)  | 0.525              | 0.992                    | 1.10 (0.85, 1.43)   | 0.464    | 0.632                    |
|               | Fasting        | 1.00               | 0.49 (0.13, 1.87) | 1.20 (0.28, 5.17)  | 0.773              |                          | 1.28 (0.62, 2.62)   | 0.500    |                          |
| Methionine    | Non-fasting    | 1.00               | 1.00 (0.50, 2.00) | 0.97 (0.50, 1.90)  | 0.932              | 0.707                    | 1.09 (0.85, 1.42)   | 0.495    | 0.729                    |
|               | Fasting        | 1.00               | 1.77 (0.44, 7.07) | 1.33 (0.30, 5.96)  | 0.763              |                          | 1.42 (0.62, 3.26)   | 0.405    |                          |
| Phenylalanine | Non-fasting    | 1.00               | 1.14 (0.57, 2.31) | 1.87 (0.94, 3.72)  | 0.073              | 0.724                    | 1.29 (0.97, 1.70)   | 0.076    | 0.703                    |
|               | Fasting        | 1.00               | 0.87 (0.25, 3.09) | 1.70 (0.37, 7.86)  | 0.551              |                          | 1.59 (0.71, 3.58)   | 0.262    |                          |
| Threonine     | Non-fasting    | 1.00               | 0.57 (0.28, 1.16) | 0.95 (0.47, 1.89)  | 0.899              | 0.940                    | 1.07 (0.81, 1.41)   | 0.650    | 0.554                    |
|               | Fasting        | 1.00               | 0.31 (0.07, 1.36) | 0.82 (0.20, 3.43)  | 0.928              |                          | 0.96 (0.53, 1.72)   | 0.889    |                          |
| Tryptophan    | Non-fasting    | 1.00               | 1.05 (0.52, 2.10) | 1.68 (0.84, 3.34)  | 0.138              | 0.494                    | 1.39 (1.04, 1.85)   | 0.025    | 0.329                    |
|               | Fasting        | 1.00               | 0.76 (0.21, 2.74) | 0.99 (0.25, 3.91)  | 0.944              |                          | 0.97 (0.51, 1.84)   | 0.926    |                          |
| Valine        | Non-fasting    | 1.00               | 1.68 (0.83, 3.40) | 2.01 (0.98, 4.15)  | 0.059              | 0.841                    | 1.36 (1.00, 1.85)   | 0.050    | 0.455                    |
|               | Fasting        | 1.00               | 0.92 (0.27, 3.18) | 2.5 (0.47, 13.42)  | 0.364              |                          | 1.72 (0.84, 3.52)   | 0.135    |                          |
| Non-essential |                |                    |                   |                    |                    |                          |                     |          |                          |
| Alanine       | Non-fasting    | 1.00               | 1.29 (0.63, 2.65) | 1.19 (0.58, 2.46)  | 0.665              | 0.242                    | 1.10 (0.83, 1.46)   | 0.507    | 0.228                    |
|               | Fasting        | 1.00               | 2.51 (0.75, 8.38) | 1.59 (0.31, 8.30)  | 0.330              |                          | 1.50 (0.72, 3.13)   | 0.278    |                          |
| Arginine      | Non-fasting    | 1.00               | 0.68 (0.33, 1.40) | 0.96 (0.48, 1.93)  | 0.986              | 0.661                    | 1.01 (0.77, 1.33)   | 0.943    | 0.467                    |
|               | Fasting        | 1.00               | 0.53 (0.16, 1.76) | 2.38 (0.5, 11.46)  | 0.521              |                          | 1.40 (0.75, 2.62)   | 0.287    |                          |
| Asparagine    | Non-fasting    | 1.00               | 0.69 (0.34, 1.40) | 1.43 (0.71, 2.89)  | 0.272              | 0.123                    | 1.07 (0.82, 1.41)   | 0.615    | 0.393                    |
|               | Fasting        | 1.00               | 0.23 (0.06, 0.89) | 0.45 (0.11, 1.82)  | 0.193              |                          | 0.79 (0.44, 1.42)   | 0.437    |                          |
| Aspartic acid | Non-fasting    | 1.00               | 1.31 (0.66, 2.61) | 0.97 (0.49, 1.95)  | 0.922              | 0.360                    | 1.13 (0.82, 1.54)   | 0.465    | 0.444                    |
|               | Fasting        | 1.00               | 0.43 (0.11, 1.76) | 2.79 (0.71, 10.92) | 0.216              |                          | 1.68 (0.94, 2.99)   | 0.079    |                          |
| Glutamic acid | Non-fasting    | 1.00               | 1.13 (0.57, 2.24) | 1.61 (0.81, 3.21)  | 0.177              | 0.556                    | 1.13 (0.84, 1.51)   | 0.430    | 0.936                    |



|           |             |      |                   |                   |       |       |                   |       |       |
|-----------|-------------|------|-------------------|-------------------|-------|-------|-------------------|-------|-------|
|           | Fasting     | 1.00 | 1.04 (0.27, 4.00) | 1.19 (0.27, 5.25) | 0.818 |       | 1.29 (0.72, 2.33) | 0.396 |       |
| Glutamine | Non-fasting | 1.00 | 1.04 (0.52, 2.07) | 1.23 (0.61, 2.48) | 0.560 | 0.468 | 1.08 (0.81, 1.44) | 0.587 | 0.135 |
|           | Fasting     | 1.00 | 1.24 (0.34, 4.55) | 0.53 (0.14, 2.06) | 0.398 |       | 0.58 (0.31, 1.06) | 0.076 |       |
| Glycine   | Non-fasting | 1.00 | 1.16 (0.58, 2.34) | 0.73 (0.36, 1.46) | 0.367 | 0.839 | 0.84 (0.63, 1.12) | 0.236 | 0.618 |
|           | Fasting     | 1.00 | 1.63 (0.41, 6.50) | 0.84 (0.21, 3.31) | 0.760 |       | 0.73 (0.40, 1.34) | 0.314 |       |
| Proline   | Non-fasting | 1.00 | 1.57 (0.77, 3.24) | 0.98 (0.48, 2.00) | 0.826 | 0.637 | 0.95 (0.72, 1.26) | 0.716 | 0.617 |
|           | Fasting     | 1.00 | 1.81 (0.53, 6.21) | 1.57 (0.30, 8.23) | 0.444 |       | 1.35 (0.67, 2.73) | 0.406 |       |
| Serine    | Non-fasting | 1.00 | 1.23 (0.61, 2.48) | 0.82 (0.41, 1.64) | 0.578 | 0.467 | 1.02 (0.74, 1.40) | 0.909 | 0.401 |
|           | Fasting     | 1.00 | 0.21 (0.05, 0.95) | 0.27 (0.06, 1.26) | 0.139 |       | 0.70 (0.40, 1.23) | 0.217 |       |
| Tyrosine  | Non-fasting | 1.00 | 1.01 (0.50, 2.07) | 2.15 (1.08, 4.30) | 0.027 | 0.597 | 1.35 (1.02, 1.78) | 0.035 | 0.851 |
|           | Fasting     | 1.00 | 1.38 (0.41, 4.64) | 1.54 (0.34, 7.03) | 0.530 |       | 1.71 (0.80, 3.66) | 0.163 |       |

<sup>a</sup>OR (95%CI) and *P* values were calculated by logistic regression after adjustment for age, sex, BMI, history of hypertension, smoking status, HDL-cholesterol, and triglycerides.
